# Supplementary material for: Systematic debriefing after qualitative encounters: an essential analysis step in applied qualitative research
Source: PubMed Central journal article supplement — BMJ Glob Health. 2018 Sep 10;3(5):e000837. doi: 10.1136/bmjgh-2018-000837 (PMC6135453; doi:10.1136/bmjgh-2018-000837), 2018-09-10
Supplement: bmjgh-2018-000837supp001.pdf [file bmjgh-2018-000837supp001.pdf]

**Debriefing Template courtesy of Dr. Shannon McMahon**

| <b>Debriefing Template</b>                                                                                                                                                                                               |                                                                                                                                                                                     |
|--------------------------------------------------------------------------------------------------------------------------------------------------------------------------------------------------------------------------|-------------------------------------------------------------------------------------------------------------------------------------------------------------------------------------|
| Question/Thought                                                                                                                                                                                                         | Please insert your notes in the boxes below. If it is a direct quote, please put it in quotation marks. Please take copious notes, no need to keep to the size of these text boxes. |
| 1. Please tell me the ID for this data collection activity                                                                                                                                                               |                                                                                                                                                                                     |
| 2. Logistical points - please give me the recording device and consent form(s). Are there any logistical issues we should discuss (finding respondents, arranging a quiet place, collecting consent, gaining trust ...)? |                                                                                                                                                                                     |
| 3. What was something you found interesting or in any relevant in this (interview or focus group)?                                                                                                                       |                                                                                                                                                                                     |
| 4. Insights relevant to knowledge of (INTERVENTION)                                                                                                                                                                      |                                                                                                                                                                                     |
| 5. Insights relevant to experience with (INTERVENTION)                                                                                                                                                                   |                                                                                                                                                                                     |
| 6. Insights relevant to attitude toward (INTERVENTION)                                                                                                                                                                   |                                                                                                                                                                                     |
| 7. What other topics came up during this interview that might be interesting for us to know?                                                                                                                             |                                                                                                                                                                                     |
| 8. Was there anything that surprised you?                                                                                                                                                                                |                                                                                                                                                                                     |
| 9. Please tell me any strong quotes                                                                                                                                                                                      |                                                                                                                                                                                     |
| 10. Are there some thoughts or insights that you are hearing again and again?                                                                                                                                            |                                                                                                                                                                                     |
| 11. Are you noticing any kinds of patterns?                                                                                                                                                                              |                                                                                                                                                                                     |
| 12. Did the respondent recommend we talk with him/her again (or anybody else)? If yes, when (or with whom)?                                                                                                              |                                                                                                                                                                                     |
