# Supplementary material for: Systematic debriefing after qualitative encounters: an essential analysis step in applied qualitative research
Source: PubMed Central journal article supplement — BMJ Glob Health. 2018 Sep 10;3(5):e000837. doi: 10.1136/bmjgh-2018-000837 (PMC6135453; doi:10.1136/bmjgh-2018-000837), 2018-09-10
Supplement: bmjgh-2018-000837supp002.pdf [file bmjgh-2018-000837supp002.pdf]

**QUALITATIVE DATA COLLECTION DEBRIEF**

|                                  |  |
|----------------------------------|--|
| <b>Time and date of debrief</b>  |  |
| <b>Location of debrief</b>       |  |
| <b>Attendees</b>                 |  |
| <b>Absent</b>                    |  |
| <b>Debrief notes prepared by</b> |  |

**1. Logistics and feasibility:**

- A. Reminder to data collectors:
- Upload audio
  - Place the consent forms in a safe location with Mehak
  - Complete the reflection notes
  - Fill in the data management spreadsheet
- B. How feasible was it to find and interview respondents in a private setting?
- C. Were there any issues with the recording quality and notetaking?
- D. Are the instruments too long? Do we have concerns about informant fatigue and if so, what do you think we should do about this?

**2. Successful aspects of the interviews**

- A. Instances of excellent probing, active listening, managing time well and keeping the interview on track?

**3. Challenges and issues faced**

- A. Instances of interviewer fatigue or distraction?

## Debriefing Template courtesy of Dr. Kerry Scott

- B. Issues with asking many yes/no questions without giving the respondents opportunities to speak at length? How could we better elicit long, descriptive, insightful responses?
  
- C. Issues of failing to follow the guide? Going off topic? Skipping around too much rather than moving topic by topic?

### 3. Content of data

Discuss the key domains, noting *major themes emerging* from today's research and noting whether some of the domains were *skipped or not explored in depth*

- A. Health needs/ care-seeking
  
- B. Health infrastructure
  
- C. Nutrition
  
- D. Water and sanitation
  
- E. Action to improve health and nutrition (what roles various actors can and should play, barriers to change)
